# Supplementary material for: Native elongating transcript sequencing reveals global anti-correlation between sense and antisense nascent transcription in fission yeast
Source: PubMed Central journal article supplement (PMC5769747; doi:10.1261/rna.063446.117), 2018-02

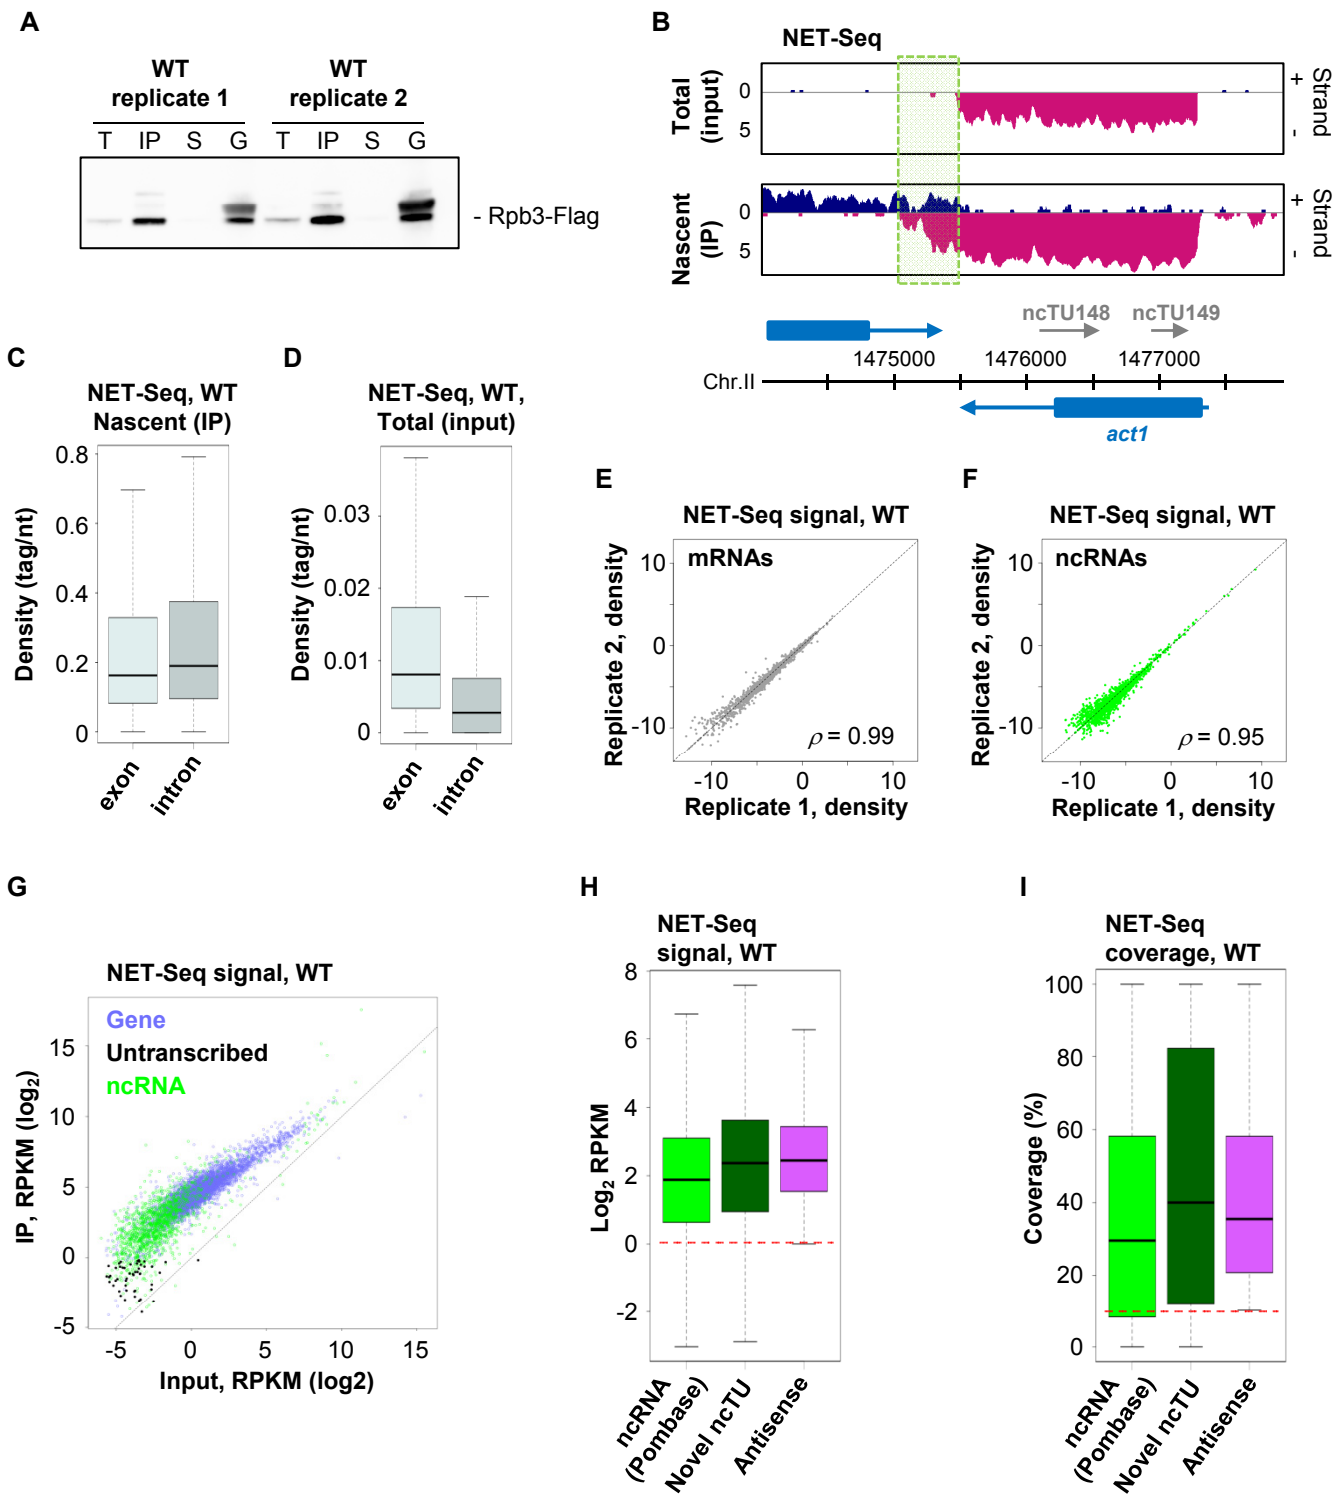

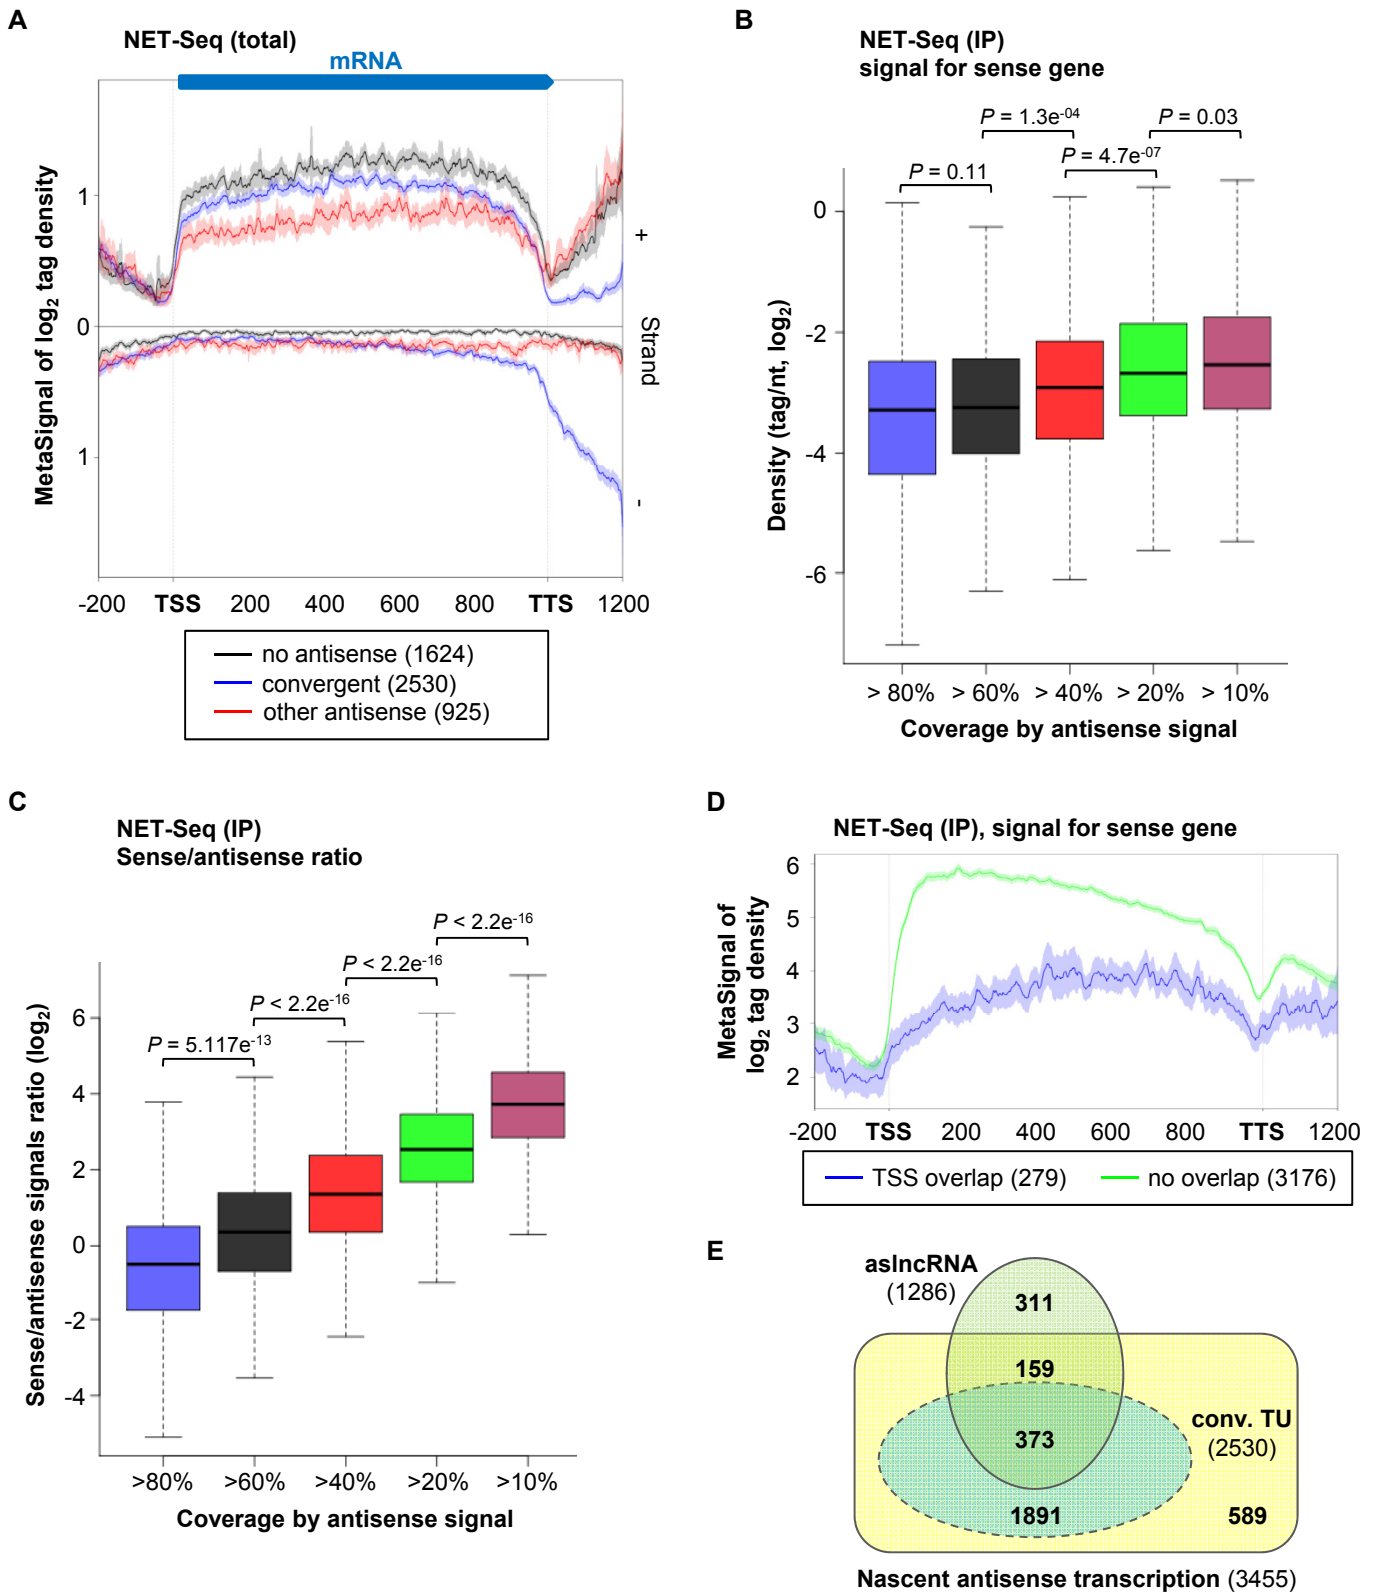

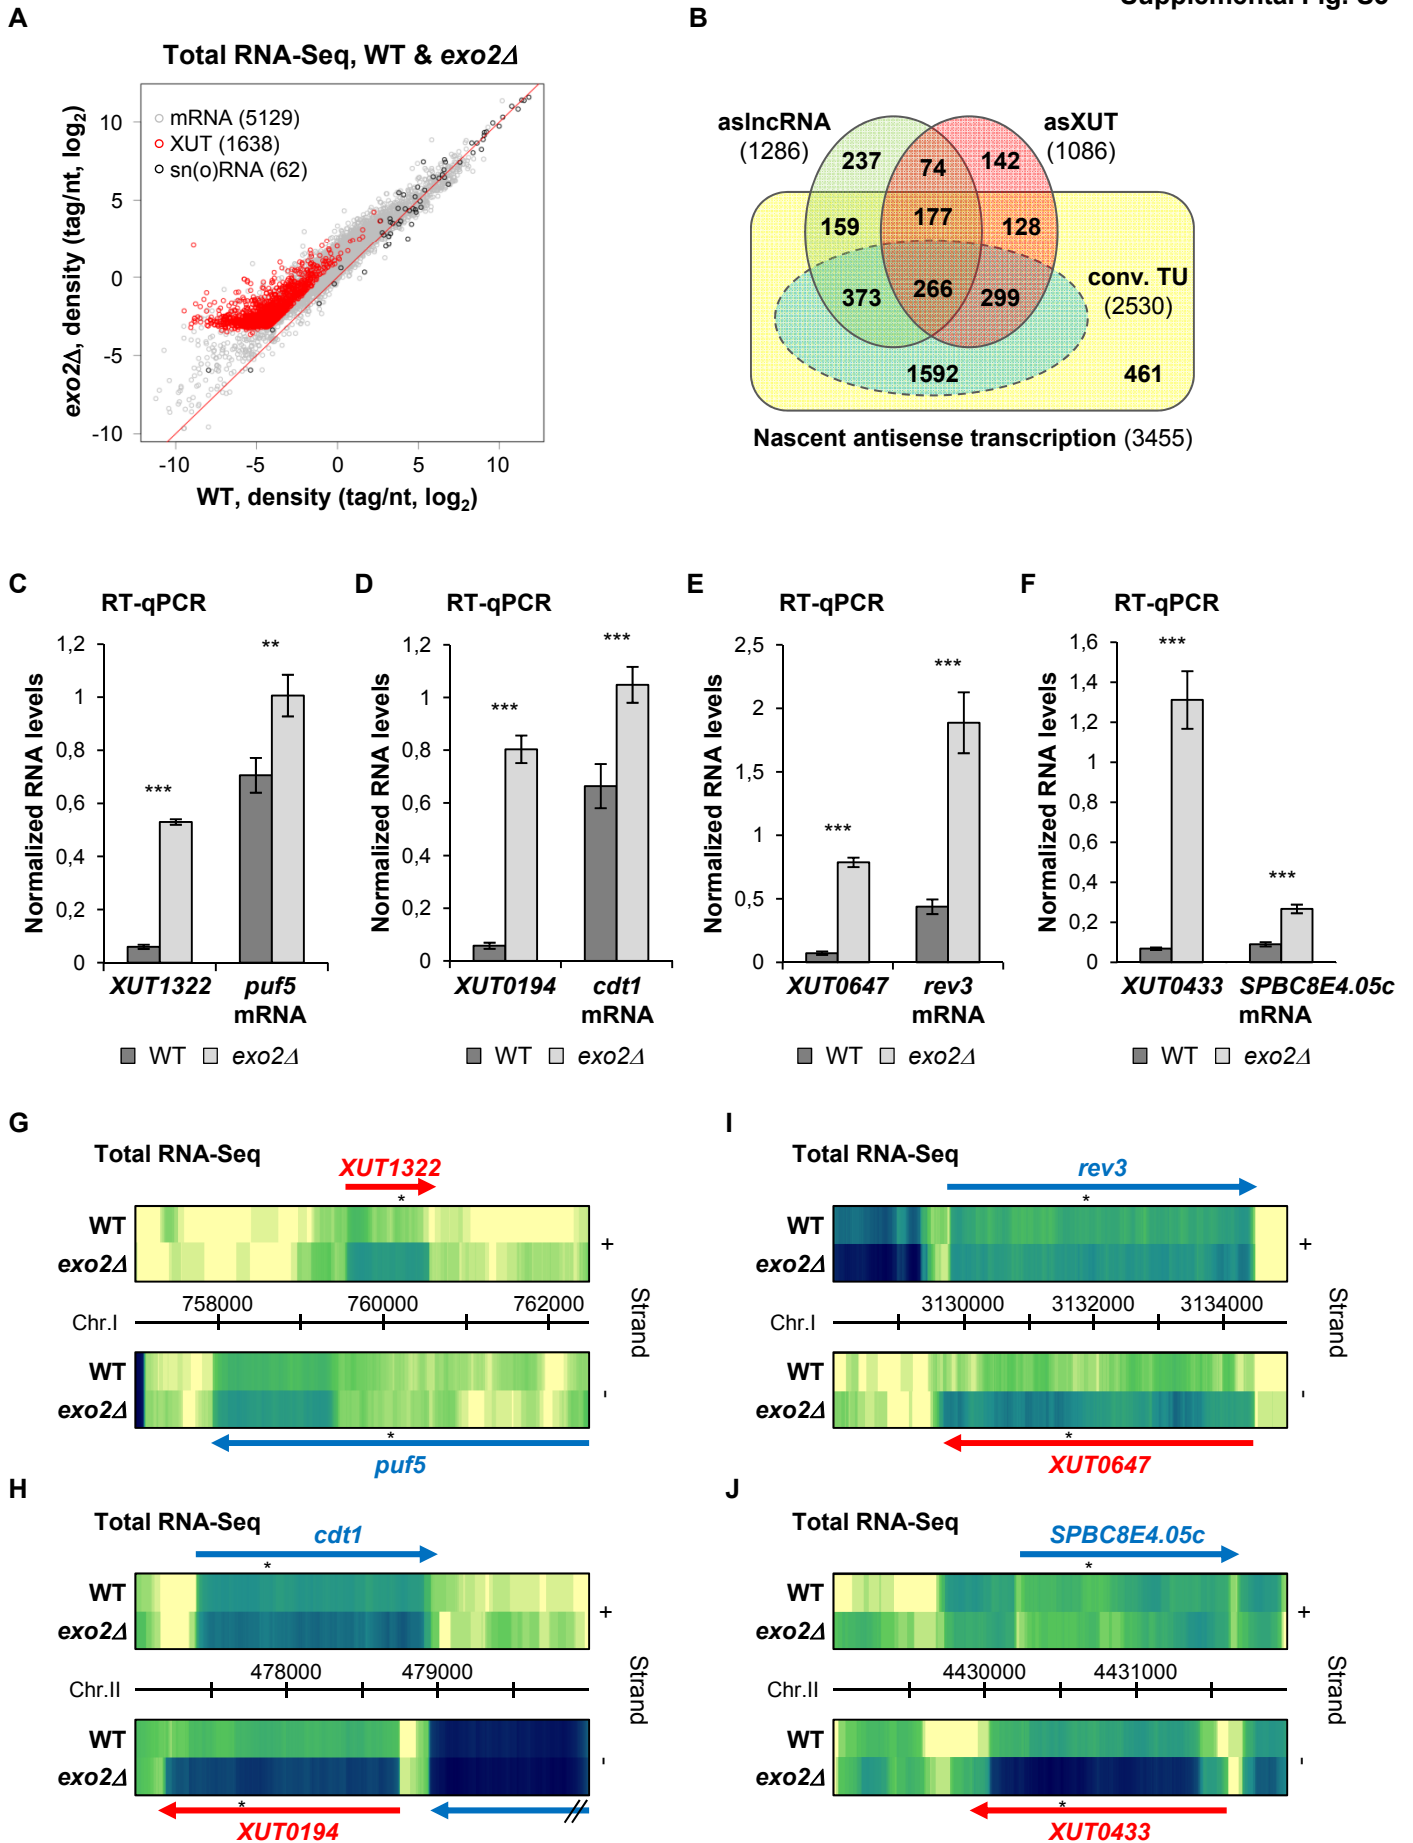

**A**

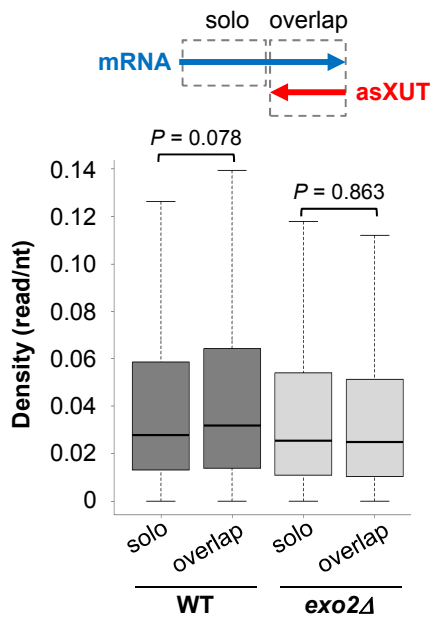

**B**

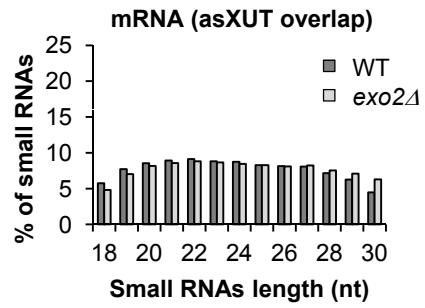

**C**

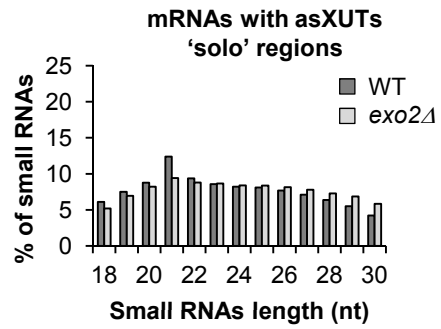

**D**

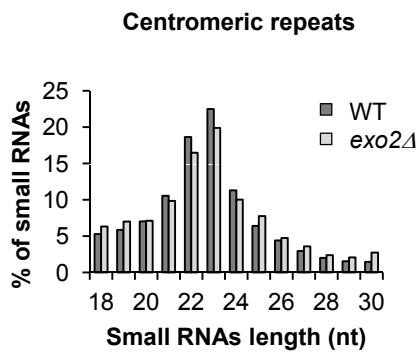

**E**

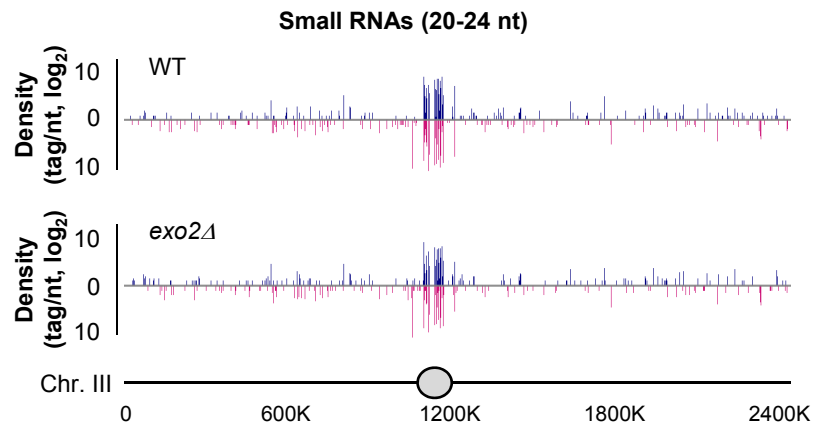

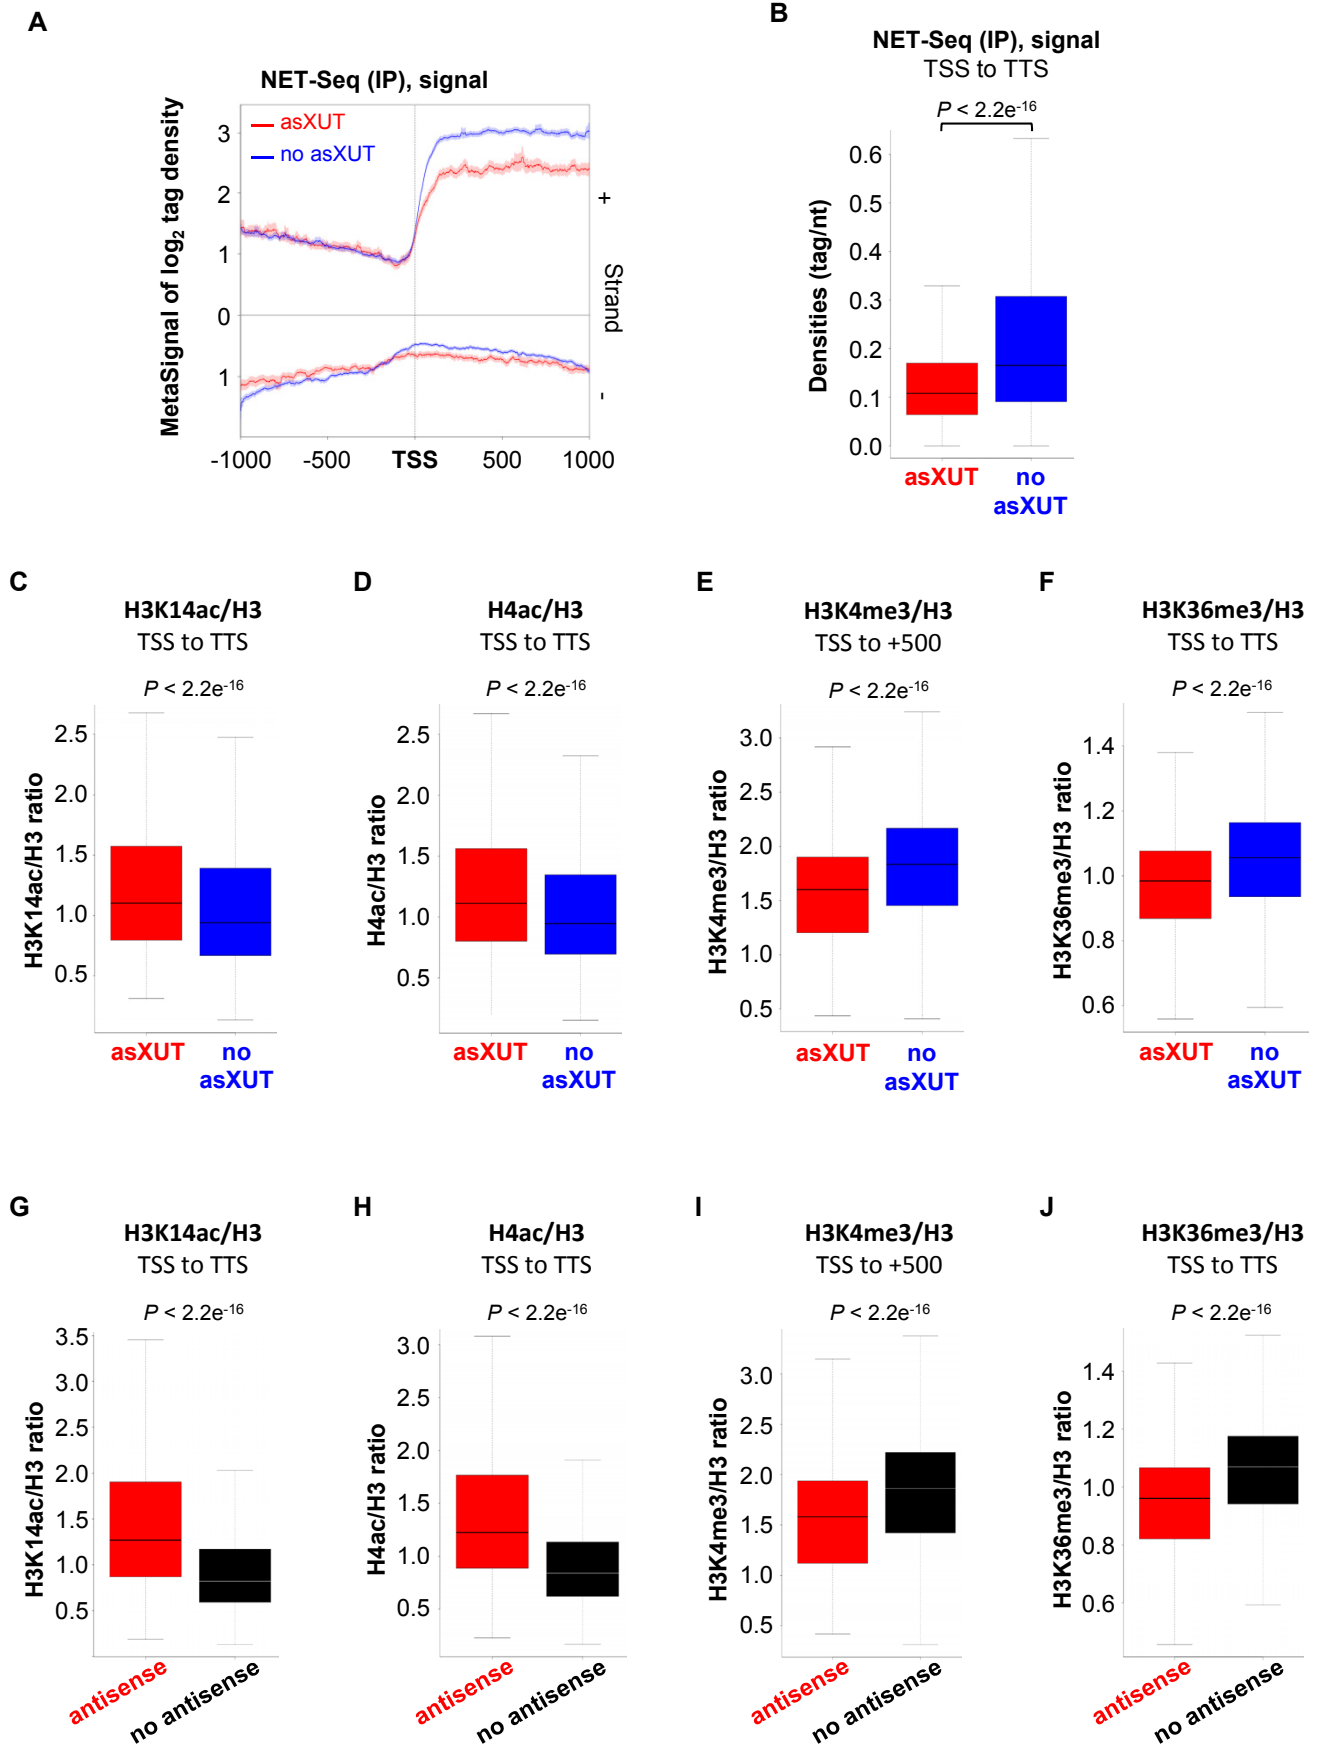

A

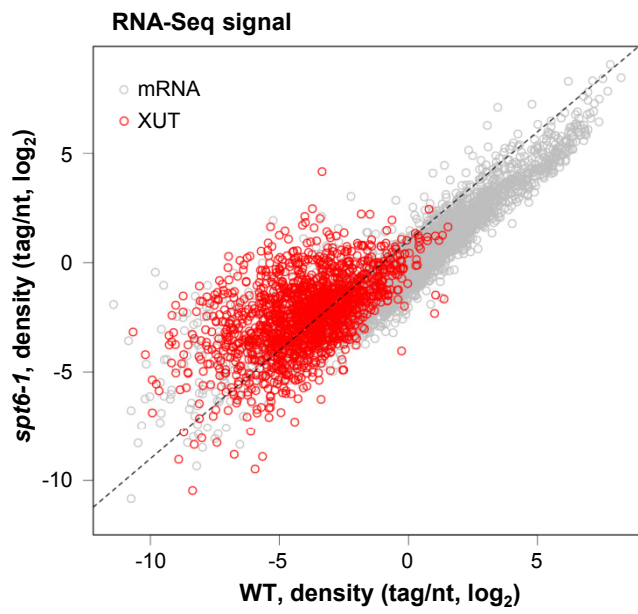

B

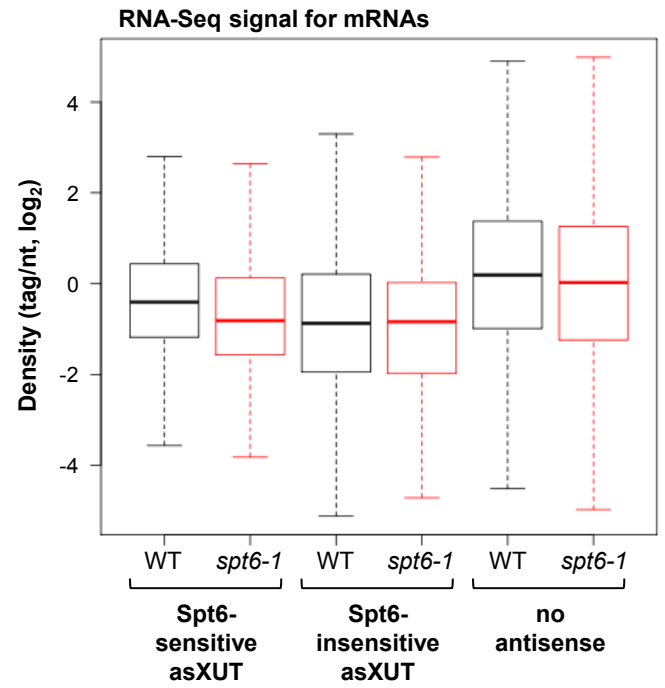

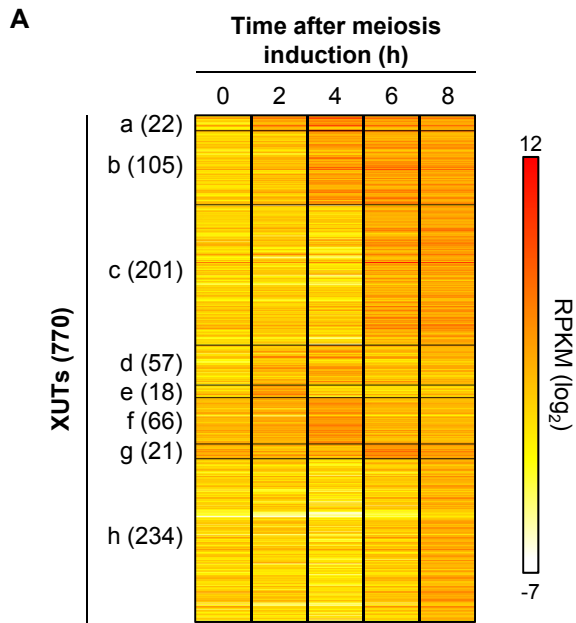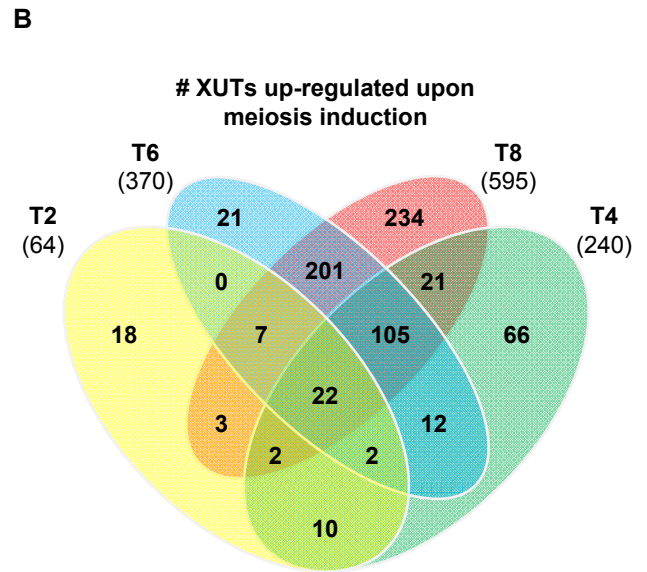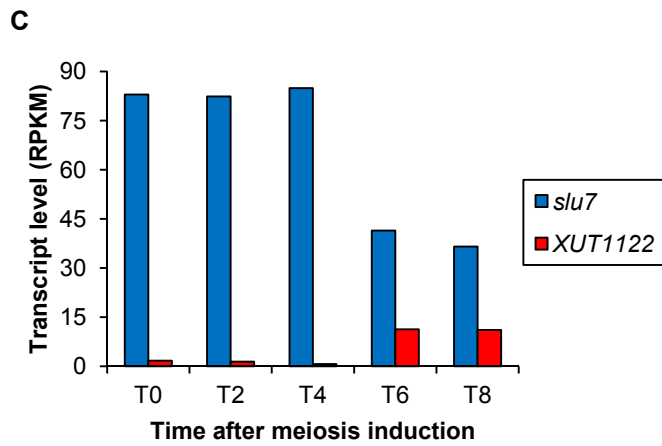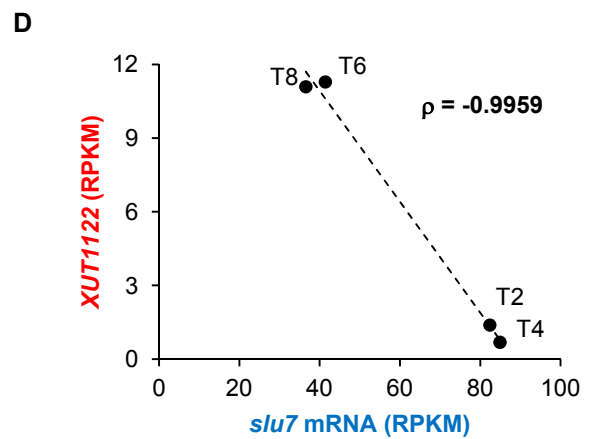

Supplement: supp_063446.117_Supplemental_Figures.pdf [file supp_063446.117_Supplemental_Figures.pdf]
