# Supplementary material for: Native elongating transcript sequencing reveals global anti-correlation between sense and antisense nascent transcription in fission yeast
Source: PubMed Central journal article supplement (PMC5769747; doi:10.1261/rna.063446.117), 2018-02
Supplement: supp_063446.117_Supplemental_Table_S1.pdf [file supp_063446.117_Supplemental_Table_S1.pdf]

**Supplemental Table S1. Oligonucleotides.**

| <b>ID</b> | <b>Sequence 5'-3'</b>      | <b>Target</b>              | <b>Use</b>                            |
|-----------|----------------------------|----------------------------|---------------------------------------|
| AMO1978   | CTAAACATCAAAGCTAACGCACCCTC | <i>exo2</i>                | Northern blot                         |
| AMO1986   | AAACAGCCGCATTGGGATGGAAGCG  | <i>XUT0444/gal1</i>        | RT ( <i>XUT0444</i> ) & Northern-blot |
| AMO1990   | TACACATGCACGGTCCTTTG       | <i>XUT0444/gal1</i>        | RT ( <i>gal1</i> ) & qPCR             |
| AMO1991   | GAGCTGGCTAAGGAATTAGGG      | <i>XUT0444/gal1</i>        | qPCR                                  |
| AMO2080   | CTTTGAGGATGTGCTGATCG       | U3B                        | qPCR                                  |
| AMO2081   | CATGACACGACCAAAAGGAA       | U3B                        | Northern-blot, RT & qPCR              |
| AMO3210   | CGAAAGAAGCCGTTTCAGAG       | <i>XUT0647/rev3</i>        | RT ( <i>XUT0647</i> ) & qPCR          |
| AMO3211   | TTTAGTGGGATCTGGGGTCA       | <i>XUT0647/rev3</i>        | RT ( <i>rev3</i> ) & qPCR             |
| AMO3214   | ACCAAACCAACCTTTGTGCT       | <i>XUT0194/cdt1</i>        | RT ( <i>XUT0194</i> ) & qPCR          |
| AMO3215   | CAACACGCTTTCCTTGATGA       | <i>XUT0194/cdt1</i>        | RT ( <i>cdt1</i> ) & qPCR             |
| AMO3219   | CAAGATGTGACGGACAGTGC       | <i>XUT0433/SPBC8E4.05c</i> | RT ( <i>XUT0433</i> ) & qPCR          |
| AMO3220   | ATTGGAACCGCCTGTTGTAG       | <i>XUT0433/SPBC8E4.05c</i> | RT ( <i>SPBC8E4.05c</i> ) & qPCR      |
| AMO2323   | AGGAAACGCTTCTTTCAGCA       | <i>XUT1322/puf5</i>        | RT ( <i>XUT1322</i> ) & qPCR          |
| AMO2324   | TGTGGGAAGACGAAATAGCA       | <i>XUT1322/puf5</i>        | RT ( <i>puf5</i> ) & qPCR             |
